# Supplementary material
Source: HighWire-hosted journal article supplement (https://bmjopen.bmj.com/content/7/2/e012348)
Supplement: inline-supplementary-material-2 [file inline-supplementary-material-2.pdf]

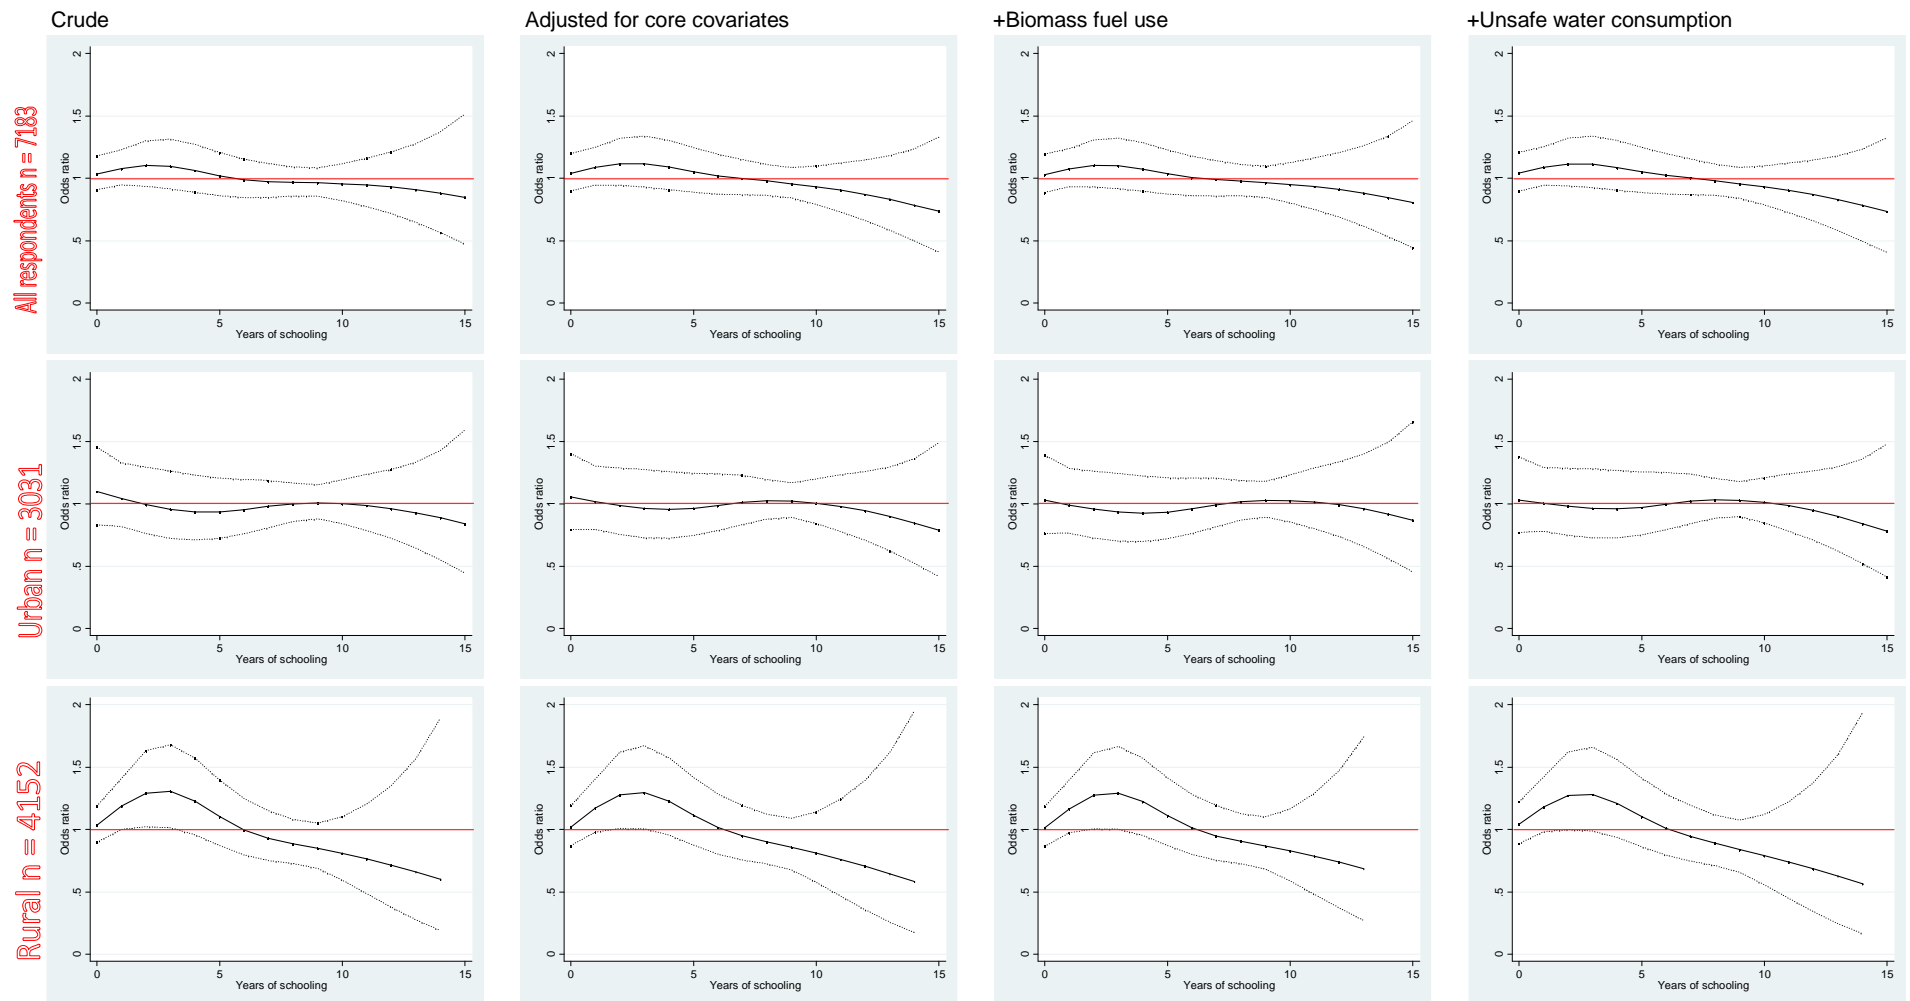

Figure S1. Odds ratios (Solid lines) and their corresponding 95% confidence bands (dotted lines) from generalized additive models (df = 3) regressing lifetime stillbirths on years of maternal schooling.
